# Supplementary material
Source: Springer Nature journal article supplement (https://www.springermedizin.de/resource/supplementary/12943_2009_644_MOESM3_ESM.pdf/9554472)

4,000 EGFP-A375 cells with:

A

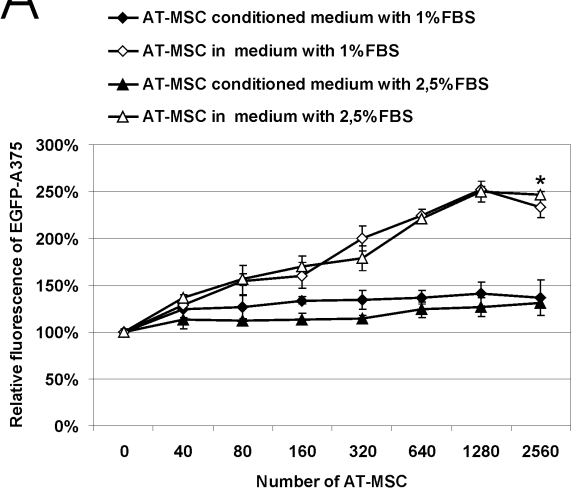

B

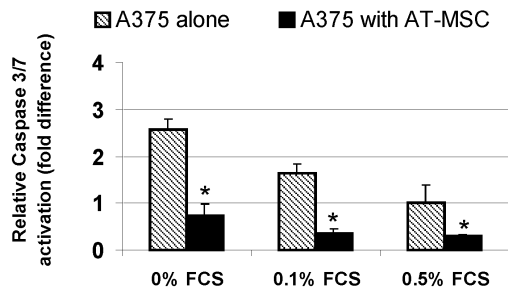

C

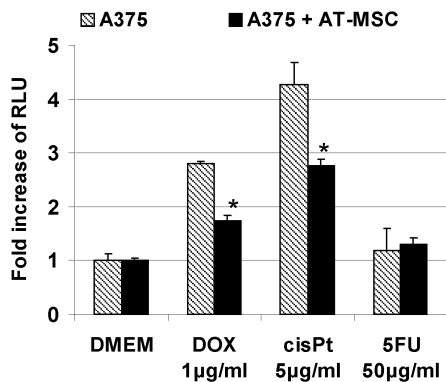

D

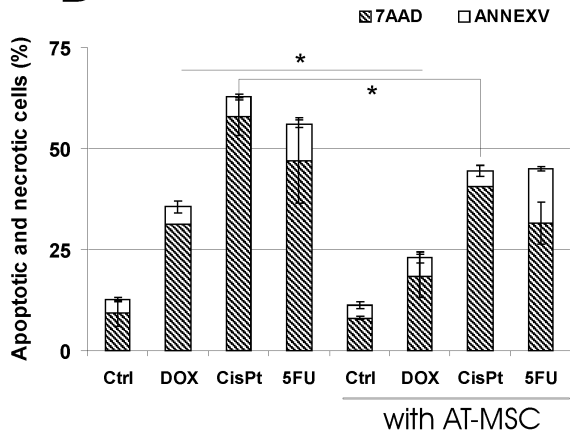

Supplement: MOESM3 [file 9554472]
